# Supplementary material for: Experiences of women sexual assault survivors with police in the early aftermath of assault: Results from a large-scale prospective study
Source: Research Square preprint supplement (doi:10.21203/rs.3.rs-4675100/v1), 2024-07-30
Supplement: Supplementary file 1 [file bbe99665d7e833ed1753cfa7.docx]

| **S1.** Complete listing of sexual assault survivor comments in response to the question, *“Is there anything that the police could have done better?”.* Responses are organized by theme, with positive and negative comments listed separately.   | **Police Respect/Emotional Support: Positive Comments** | | --- | | Officer (name) of (name of police department) was very kind and saw I was in shock. He immediately took me to (name) Hospital. In there and had a doctor give me a calming medicated pill so I could complete forensic examination. | | I thought they did a great job. The time that it takes to process evidence takes a while but other than that the officers were very kind and understanding. | | The police that I spoke with was very nice, polite, easy spoken given the situation I was in, and has continued to be this way with me and my family. | | Under the circumstances, no, the officer was very nice. | | They respected me and treated me very well. And I had a lot of interaction with them. They did a great job. | | They treat me with respect. | | Police officer at (name) health was very patient and non-invasive | | She was very thorough, kind and made me feel comfortable about everything. | | They were very supportive and helpful in my decision. | | They were very helpful and understanding. | | The police department was great during the whole process, very helpful and supportive. They caught the perpetrator and put him in jail. Unfortunately, ... the perpetrator bailed out and the police could not do anything to keep him in jail. | | The night it happened, the police were extremely helpful and kind. | | The police officer I spoke with directly after the incident was nice and kind. | | They did an amazing job with me. They were very thorough and respectful they didn’t push too hard and they did everything to make sure i was comfortable talking | | They were very assertive and kind. | | I believe that I was treated with respect and care, and also given a good deal of information encouraging me to make a report. | | Everyone was empathetic and did their jobs beautifully. | | I first spoke to police about an hour after the assault because the police were the ones who found me. They, along with EMS, were very caring and seemed to be very compassionate with me. | | The police was very knowledgeable in what they were doing and helped me and of course my family a lot during the filing of the report. | | For my case absolutely not, they did an amazing job all the way around. I know that I am very fortunate to have had an amazing force on my side working with me to help find this person. They found him within days of the attack, I couldn't have asked for better. | | They did a very great job and was able to catch the man that did it. They did their best to help me. | | **Police Respect/Emotional Support: Negative Comments** | | My officer unintentionally intimidated me with his size, reminding very much physically of the person who attacked me. This was further exacerbated by sitting between myself and the door. Even though I had a female advocate in the room with me, I felt trapped. I am fortunate that my officer was very much a gentleman and understood my fears and took steps to alleviate them as much as possible. He sat in a low chair obscuring his size behind a desk, which made him appear more approachable. Also, he was exceptionally empathizing, patient, and friendly. However, I would have felt more empowered if he did not sit between myself and the door. | | The police officers who met me at the hospital didn't believe or support me | | I feel like I was being treated as the perpetrator rather than the victim. Also they seemed to be withholding information from me and not giving me any information. | | Looked better and treated me with more respect. | | At first he was super nice and then he was rather rude. | | I asked to be taken to hospital, instead he took me to my apartment. I had to call back a different officer too me in. Same but he came to take evidence and still haven't heard. | | Not joke about how I met the perpetrator, do not make me feel like it was my fault! | | Treated me with better respect and give more frequent updates as to how my case is going. | | Just been a little more sympathetic. | | Show more empathy and instead of just nodding like they are listening and paying attentions actually ask questions even though they try not to be emotionally involved, try to look like you care and take the situation seriously instead of like I am a liar. | | The police officers who met me at the hospital didn't believe or support me. | | Compassion. | | The police could have been more supportive and asked more questions. | | I feel like the police officer just listened, didn't pay attention to what I was saying or how I felt at the moment. I feel like he could have been a bit more sensitive to how I was feeling, and more sensitive with his questions. | | I feel that they could have had a little more empathy even though I reported it at a very late time early morning. I know they were not happy to be there, but they could have been more empathetic | | The police got a statement while I was still incoherent and unable to speak for myself. | | The first officer who responded spoke to me in a shaming manner, I wish he hadn't. | | They basically said that what happened was my fault. How is that even possible when I was fully dressed in a tshirt, shorts, and shoes as I usually am? | | When I arrived to the police station. I told them what happened they laughed while I was saying my story. The police should some respect to a victim like me. Coming in to the police station was hard enough, and then being made fun of was even more hurtful. I confronted them about why they are laughing and their response was (they) were not laughing but clearly they were. | | The officer I was working with could have been less condescending and treated me like the rape wasn't my fault. | | The operator for the dispatch could have been more empathetic and less confrontational. The officer could have shown more empathy and interest as well. | | Not judge me. | | They could have left me alone, as I had not requested their presence. They could have not tried to cram their opinions and ideas about what they thought I should do down my throat. They could have been respectful that I had been through a traumatic event and just wanted some medical care and not delayed it by hours badgering me with questions I was not ready to answer and issues is had not yet decided how to address. | | I think that sensitivity in cases like this is very important to the victim. The police were nice and professional, however I wish there was more sensitivity and kindness rather than awkward and stone faced. | | I felt very pressured to handle the situation the way the police officers thought was best. I did not want to go to the hospital the night of the assault, but the officers were persistent that I go and stated that I would regret not going. I chose to go to the hospital the next morning. In the future, I would suggest that officers avoid making the victim feel guilty about their decision on how to handle the situation. | | I feel that they pointed the fingers at what I did or didn’t do. | | Not blamed me for what happened. They said I needed to be more careful when I first meet someone. | | Been more help full and quit looking at me like I had done something wrong. It was not what they said but how they acted at me coming in and out like I was lying about then said did not mean to make you feel uncomfortable but that they have to treat everyone the same so i think they could learn to have more heart and compassion because I was already so very scared and terrified uncomfortable got violated then kinda got violated again by getting examined. | | I think that sensitivity in cases like this is very important to the victim. The police were nice and professional, however I wish there was more sensitivity and kindness rather than awkward and stone faced. | | Made me feel more comfortable while at the hospital, I felt like other were staring at me and they knew what was going on as if I did something wrong. | | Listen to my needs and concerns better. Not use ""verbal jujisu"" on me after the assault. Treat me with respect. | | They basically make you feel stupid, and ultimately at fault. | | They were very judgmental and seemed hesitant as if I wasn't telling them the truth. Unfortunately, they were very skeptical about the story and kept asking the same questions over and over as if they were expecting me to change my answer and my story. I think that they could have respected the situation a little more and provided me with more information on the next steps they were going to be taking. | | I think the police could maybe be a bit more sensitive to victims, and not treat them as if they're the criminals. And recognize that they are victims. And kind of commend them for coming forward in the first place. | | It seemed as though because I had been drinking prior to the incident, they thought I had some sort of drinking problem. I was informed I had a warrant out for my arrest in the state the assault occurred in from 6 years prior due to not registering my car and before the officer knew exactly what it was for, he assumed/ asked me if it was for a DUI. | | When I first met the police i was still very disoriented. However, I was also not completely clothed and felt very unsafe and uncomfortable. I asked for clothes or something to cover myself with. They did not provide anything. I know that police officers typically have blankets for people experiencing shock or hypothermia, and couldn't figure out why no one would provide me clothing. The officer I was speaking with was wearing plenty of clothing, and was a man. My breasts were exposed and after being assaulted, this certainly did not make me feel safe. | | The first initial officers on seen after the assault didn’t want to hear me and didn’t care and just sent me home in an uber. It was the officers that came to the hospital to take my report that I was very pleased and impressed with. I wish the first officers didn’t just blow me off cause I was drinking but overall I am just glad that someone finally heard me out and took me seriously. | | The night of the event I was intoxicated, but the man who assaulted me had also been drinking. Police said he seemed fine and didn't suspect him of having done anything to me. They told my family I didn't look as if I had been forced at all. I wish they had given him a breathalyzer and looked more into the situation that night. They were quick to give me a ticket for underage drinking and because I was in the man's car in the driver's seat. I don't know how I got there but I just felt that things were overlooked. | | The officer told me it was my word against his, and due to there being no serious injuries as well as recordings its best not to press charges. So I took his word for it. I’m disappointed because I feel I can really go nowhere with the report unless another woman files on the same person. That gives me some hope. | | They should have arrested the man who assaulted me instead of trying to pressure and manipulate me into 'admitting it was consensual' (not true). | | I didn't really want to talk to a male officer. I should have been given a choice if I was not comfortable with him. | | The police officers showed up to my house the following day to ""check in"" at seven am on a Saturday, I was extremely intimidated and uncomfortable. It was not the police officer from the previous evening. I was exhausted from the rape kit and hospital visit and was very uncomfortable and alarmed answer the doors to two grown men in my pj's at seven am to talk about my assault... I already had told the police officer from the night before every single thing they asked me, just didn't care to be bothered with it by a surprise visit like that. | | They sent three police. I would of felt more comfortable with two. | | I would of rather spoke with a woman officer… was very uncomfortable speaking on certain topics | | The sight of a cop can be very stressful and it made me feel even less comfortable in the time of trauma. Maybe be out of uniform. | | It would have been better if they didn't have to give me a ride to SANE. I've never been in a cop car until then, and being frisked and patted down right after being raped made me wish I would have just walked or gotten an Uber. That was super violating after what happened to me, and scared me. | | There were 4 different cops there. I wish there were less | | Think they should have had a girl officer there. | | I felt like one of the officers didn't believe my statements, or tried to get me to admit I had too much to drink and that is why I couldn't remember the night in question. | | Been more helpful and quit looking at me like I had done something wrong it was not what they said but how they acted at me coming in and out like I was lying about then said did not mean to make you feel uncomfortable but that they have to treat everyone the same so i think they could learn to have more heart and compassion because I was already so very scared and terrified un comfortable got violated then kinda got violated again by getting examined | | **Police Communication: Positive Comments** | | Under the circumstances, no, the officer was very nice and listened to me and gave me the option to think things over and decide what I wanted to do. | | The officers did a great job of answering all of my questions and making sure I had their contact information in case I needed anything | | No there isn't. They listened and communicated what was going to happen next.. | | I believe the police did a good job listening to my needs . | | They were very thorough and respectful they didn’t push too hard and they did everything to make sure i was comfortable talking | | No, I believe that I was treated with respect and care, and also given a good deal of information encouraging me to make a report. | | **Police Communication: Negative Comments** | | Try not to discourage people from taking other people to court and going on about how even if i did file a report there was no guarantee that he would be convicted. | | They could've explained things (especially the process/procedures/my rights) more thoroughly. I feel like I was being treated as the perpetrator rather than the victim. Also they seemed to be withholding information from me and not giving me any information. I was asking for a copy of my statement other than important paperwork - after I signed and they refused to give me a copy. | | I was told there was a chance there could be a warrant out for his arrest. But I did not get a confirmation on that warrant. It would have been helpful to know when the warrant was assigned and to get notified when/if he got arrested. That would make me feel safer. | | Left when I asked them the first time, not hours later still trying to ask questions of me. | | Listen. | | They could have asked when I was available for a statement. They called me at times when I was unavailable. | | They were not forthcoming about what my options were, and I ended up thinking I could take a course of action that did not exist, and they did not speak up. Also, they would not inform me of the circumstances of what happened and since I didn't remember anything of the assault, it was frustrating that everyone knew more than me. | | Show more empathy and instead of just nodding like they are listening and paying attention actually ask questions even though they try not to be emotionally involved, try to look like you care and take the situation seriously instead of like i am a liar. | | The police didn't believe a crime had occurred, so they did not file a report and I was never contacted by anyone again. | | The police could have been more supportive and asked more questions. | | The police could have explained my options on how I can choose to go about the situation more thoroughly. | | The officer was very professional in his demeanor and when taking the report. It could have been a little more comfortable when giving my statement though. I was in more of an interrogation room it felt, instead of a soft interview room, and there were no tissues or a trashcan until I had requested them. Additionally, it would have been reassuring to know what the next steps were. The patrol officer taking my report was uncertain of the steps that were involved, apart from the fact that he needed to give it to the appropriate investigators and that they would handle it from there. I find comfort in knowing what is going on and what I can do, if anything, or simply knowing that there is nothing more I can do because I've already done everything I could have. | | The officers could have paid closer attention to the details of my statement, so that things didn't get misconstrued. Or, they could have asked me to clarify the things that they were unsure of. | | He could have been more thorough while explaining to me the procedure, that is all. | | I would have preferred more communication and time to ask questions. I wish they had more answers (which isn't their fault). | | More communication. | | Left their contact information when they were at my apartment. | | I think just knowing what exactly the process would have looked like at SANE a little better would have helped me | | Listen to my needs and concerns better. Not use ""verbal jujitsu"" on me after the assault. Treat me with respect. | | I felt slightly rushed and the ride to the hospital was very uncomfortable. The officers’ voices felt too stern and serious over the course of the conversations. | | Read the statement back to the assaulted person to make sure the story will be reported correctly. | | I asked them to be discreet and they sent mail to my home with sex crime on the envelope which caused my family to question me. | | **Police General/Overall Job Performance: Positive Comments** | | The police were extremely helpful. | | They helped every way possible. | | I believe they did an amazing job at helping me! | | They did everything I needed them to do. | | I thought they did a great job. The time that it takes to process evidence takes a while but other than that the officers were very kind and understanding. | | They all were very helpful. | | I think he did everything I would have wanted him to do. | | I think the police did a great job and not anything they could do better. | | They were great. | | The police have been very thorough and helpful. | | They were wonderful. :) | | I think the police officer that I talked to did great. | | Everything was just fine on what they did for me and helped me on. | | Nope, the officer was pretty good. | | The police were great. | | They did all they can do. | | The police have done a great job so far. | | She was very thorough, kind and made me feel comfortable about everything. | | I really enjoyed working with the (name of police department). | | They did everything they could. | | I was generally satisfied; I don't have any suggestions. | | They helped me the best they could. | | They were very supportive and helpful in my decision | | They were very helpful and understanding | | They are doing the best to make sure that everything is handled to the best of their ability. | | They did their job. | | The police department was great during the whole process, very helpful and supportive. They caught the perpetrator and put him in jail. Unfortunately, ... the perpetrator bailed out and the police could not do anything to keep him in jail. | | Everything went well. | | The police were very good to me. | | I feel that the police did what he could and I appreciate all he did for me in that moment. | | They were wonderful. | | Everything was really good. I didn't even know they had that SANE type of organization. You guys are doing everything right. I don't know what would make everything better. | | They were excellent. | | The night it happened, the police were extremely helpful and kind. | | They did everything they could for me. | | The police handled it well. It was just extremely emotionally taxing to speak to them about the ordeal. | | They handled my situation very well. | | They did an amazing job with me. They were very thorough and respectful they didn’t push too hard and they did everything to make sure I was comfortable talking. | | They were very assertive and kind. | | They did a great job. | | Everyone was empathetic and did their jobs beautifully. | | The police did a very well job. I don't think there is anything that needed to be improved. | | They did an amazing job! | | I think they were really great. I think the process was a little too long, just getting from the reporting stage to the exam; that was a little lengthy. Everything else was really good. | | I think they did what was expected of them. | | They have done an outstanding job!!!!!! | | They did a fantastic job and took care of it immediately. | | I thought that the officer did a fantastic job with this sensitive subject. | | For my case absolutely not, they did an amazing job all the way around. I know that I am very fortunate to have had an amazing force on my side working with me to help find this person. They found him within days of the attack, I couldn't have asked for better. | | **Police General/Overall Job Performance: Negative** | | Everything. | | She could have done a lot better | |
| --- | --- | --- | --- | --- | --- | --- | --- | --- | --- | --- | --- | --- | --- | --- | --- | --- | --- | --- | --- | --- | --- | --- | --- | --- | --- | --- | --- | --- | --- | --- | --- | --- | --- | --- | --- | --- | --- | --- | --- | --- | --- | --- | --- | --- | --- | --- | --- | --- | --- | --- | --- | --- | --- | --- | --- | --- | --- | --- | --- | --- | --- | --- | --- | --- | --- | --- | --- | --- | --- | --- | --- | --- | --- | --- | --- | --- | --- | --- | --- | --- | --- | --- | --- | --- | --- | --- | --- | --- | --- | --- | --- | --- | --- | --- | --- | --- | --- | --- | --- | --- | --- | --- | --- | --- | --- | --- | --- | --- | --- | --- | --- | --- | --- | --- | --- | --- | --- | --- | --- | --- | --- | --- | --- | --- | --- | --- | --- | --- | --- | --- | --- | --- | --- | --- | --- | --- | --- | --- | --- | --- | --- | --- | --- | --- | --- | --- | --- | --- | --- | --- | --- | --- | --- | --- | --- | --- |
